# Supplementary material for: A Novel α – helix /β -sheet ratio as a Potential Metric For Studying Thermal Effects of Increased Formaldehyde Temperatures on Native Tissues
Source: Research Square preprint supplement (doi:10.21203/rs.3.rs-8773932/v1), 2026-02-13
Supplement: Supplementary file 1 [file 14f539ae968d7bcc37be6b8f.docx]

Supplementary fig. 1: Spectra information on effect of formalin on protein structure of liver tissues fixed at varying temperatures of 25 ͦС, 37 ͦС and 60 ͦС respectively.

Supplementary fig. 2: Spectra information on the effect of formalin on the protein structure of lung tissues fixed at varying temperatures of 25 ͦС, 37 ͦС, and 60 ͦС, respectively.

Supplementary fig. 3: Spectra information on the effect of formalin on protein structure of kidney tissues fixed at varying temperatures of 25 ͦС, 37 ͦС, and 60 ͦС, respectively.


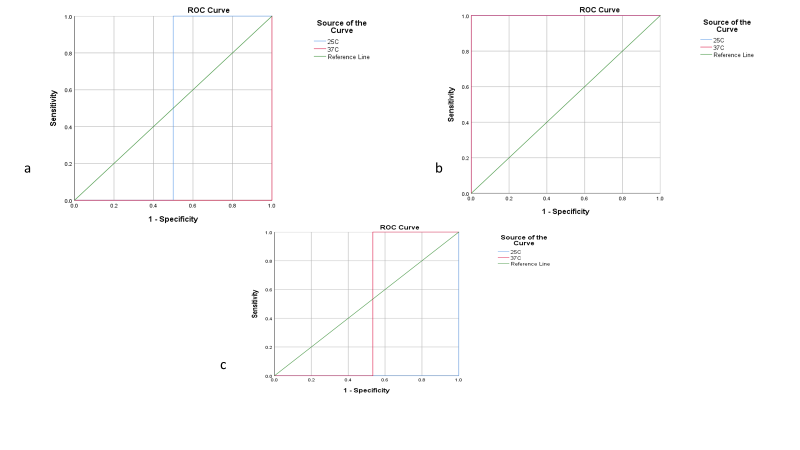


**Supplementary Fig 4:** Performance test on α – helix /β -sheet ratio of (a) liver tissues, (b) lung tissues and (c) kidney tissues formalin-fixed between 25 ͦC and 37 ͦC


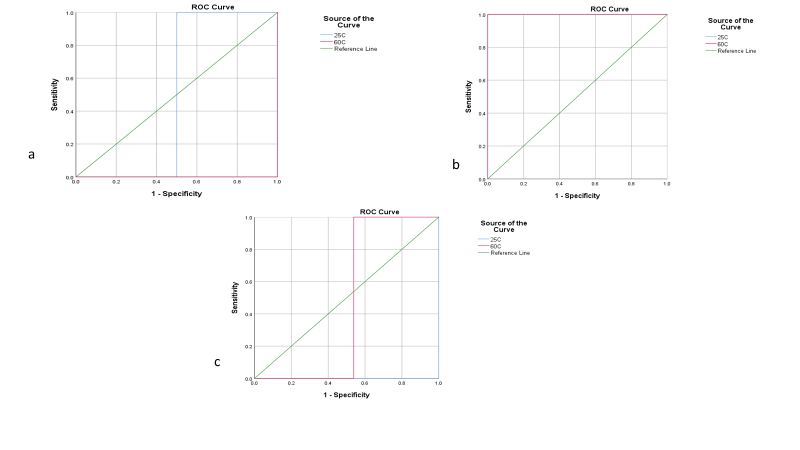


**Supplementary Fig 5:** Performance test on α – helix /β -sheet ratio of (a) liver tissues, (b) lung tissues and (c) kidney tissues formalin-fixed between 25 ͦC and 60 ͦC


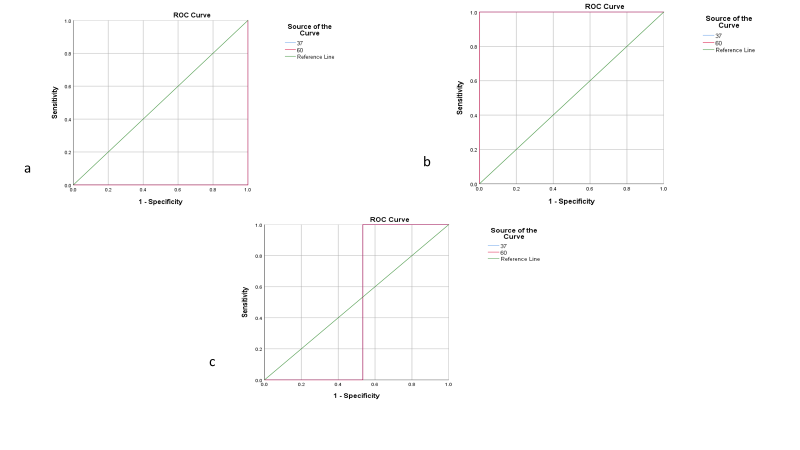


**Supplementary Fig 6:** Performance test on α – helix /β -sheet ratio of (a) liver tissues, (b) lung tissues and (c) kidney tissues formalin-fixed between 37 ͦC and 60 ͦC
